# Supplementary material for: Identification of Streptococcus thermophilus Genes Specifically Expressed under Simulated Human Digestive Conditions Using R-IVET Technology
Source: MDPI journal article supplement (doi:10.3390/microorganisms9061113), 2021-05-21
Supplement: s1 [file s1]

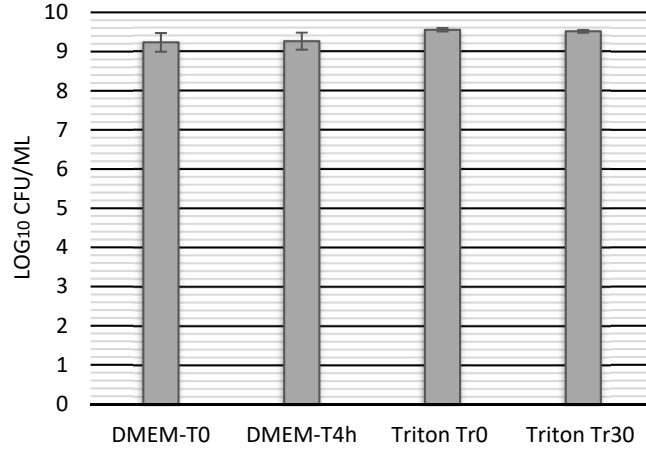

**Figure S1.** Survival of the R-IVET library in adhesion experiment conditions. Data represent means  $\pm$  SEM from two independent experiments ( $n = 2$ ) expressed by  $\log_{10}$  CFU/mL viable bacterial population level determined by plate count.

**Table S1.** Oligonucleotides used for the constructions, verification of chromosomal R-IVET cassette, sequencing of inserts from activated clones and amplification of activated genes in various *S. thermophilus* strains

| #  | Sequence 5'→3'                                                       | Characteristics                                                                                                                                                                                                                                                     |
|----|----------------------------------------------------------------------|---------------------------------------------------------------------------------------------------------------------------------------------------------------------------------------------------------------------------------------------------------------------|
| 1  | ATCCGTAAAACCATCAATCTTAATT                                            | Amplification of the UP#1 fragment from <i>S. thermophilus</i> LMD-9 with #2 (1204 pb) [56.9°C]<br>Used in the first overlapping PCR with #8 (3783 pb) [†]                                                                                                          |
| 2  | TCCCCAAGCAAAAATTGGAAC                                                | Used with #1                                                                                                                                                                                                                                                        |
| 3  | TCCAATTTTGTCTGGGGACCAAGCAACCATT<br>TGAG                              | Amplification of the promoter (prom) of kanamycin resistance gene from <i>S. thermophilus</i> TIL1193 with #4 (525 pb) [56.9°C]                                                                                                                                     |
| 4  | TCTACAGTATTTAAAGATACCCC                                              | Used with #3                                                                                                                                                                                                                                                        |
| 5  | GTATCTTTAAATACTGTAGAATAACTTCGTATA<br>GCATACATTATACGAAGTTATAAACAGGAA* | Amplification of the promoterless kanamycin resistance gene ( <i>kanR</i> ) from <i>S. thermophilus</i> TIL1193 with #6 (1032 pb) [56.9°C]                                                                                                                          |
| 6  | GTTGCGGATGTACTTCAGAAAAG                                              | Used with #5, #11 and #17                                                                                                                                                                                                                                           |
| 7  | TTTCTGAAGTACATCCGCAACGTAATGTTTGG<br>TGTAGGTAATA                      | Amplification of the DOWN#1 fragment from <i>S. thermophilus</i> LMD-9 with #8 (1146 pb) [62.7°C]                                                                                                                                                                   |
| 8  | TTAAACCAATCTGTCTCGGG                                                 | Used with #1 and with #7                                                                                                                                                                                                                                            |
| 9  | GGAACAAAAGCACCCACACT                                                 | Confirmation of <i>prom-loxP-kanR</i> presence in <i>S. thermophilus</i> STUL5002 and sequencing with #10 (4319 pb) [58°C]                                                                                                                                          |
| 10 | TTAGGCTGGATGGCATAACC                                                 | Used with #9                                                                                                                                                                                                                                                        |
| 11 | CTACGAGACCTACTTAGCGC                                                 | Amplification of the UP#2 fragment from <i>S. thermophilus</i> STUL5002 with #12 (1088 pb) [62.7°C]<br>Used in the second overlapping PCR with #6 (3421 pb) [†]                                                                                                     |
| 12 | CTAGTTATCTACACGACGGGGAGTCAATAACT<br>TCGTATAATGTATGC                  | Used with #11                                                                                                                                                                                                                                                       |
| 13 | TGACTCCCCGTCGTGTAGATAAC                                              | Amplification of the spectinomycin resistance gene ( <i>specR</i> ) from pSET4S and sequencing of the <i>S. thermophilus</i> STUL5003 cassette with #14 (1200 pb) [62.7°C]                                                                                          |
| 14 | CGCTACGATAACGCCTGTTT                                                 | Used with #13                                                                                                                                                                                                                                                       |
| 15 | AAACAGGCGTTATCGTAGCGGCTTCTGGAGCT<br>CAATTGAA                         | Amplification of the <i>las</i> operon transcriptional terminator <i>Tlas</i> with #16 (252 pb) [62.7°C]                                                                                                                                                            |
| 16 | CTAAAGCTGACGGGGTAAAC                                                 | Used with #15                                                                                                                                                                                                                                                       |
| 17 | GTTTACCCCGTCAGCTTTAGATAACTTCGTATA<br>GCATACATTATACGAAGTTATAAACAGGAA* | Amplification of the <i>loxP</i> -DOWN#2 fragment from <i>S. thermophilus</i> STUL5002 with #6 (947 pb) [62.7°C]                                                                                                                                                    |
| 18 | GCTTCTGGAGCTCAATTGAAAG                                               | Amplification of the insert in the recombinant plasmid derived from pULNreB with #19 (variable but >460 pb) [58°C]                                                                                                                                                  |
| 19 | ATTCAACTTGCACCATGCCG                                                 | Used with #18                                                                                                                                                                                                                                                       |
| 20 | CGAAATAAGAGTAATATAGAG                                                | Sequencing of the <i>S. thermophilus</i> STUL5003 cassette with #21 (490 pb) [58°C]                                                                                                                                                                                 |
| 21 | TAGTATCGACGGAGCCGATT                                                 | Used with #20                                                                                                                                                                                                                                                       |
| 22 | CCAGGACAATAACCTTATAGC                                                | Sequencing of the <i>S. thermophilus</i> STUL5003 cassette with #23 (536 pb) [58°C]<br>Test for presence or absence of the <i>loxP-specR</i> fragment in the R-IVET cassette with #29 (with <i>loxP-specR</i> : 2091 pb; without <i>loxP-specR</i> : 628 pb) [58°C] |
| 23 | TCCTCCTCACTATTTTGATTAGTACC                                           | Used with #22                                                                                                                                                                                                                                                       |

|    |                              |                                                                                     |
|----|------------------------------|-------------------------------------------------------------------------------------|
| 24 | AATAGGTACTAATCAAAATAGTGAGG   | Sequencing of the <i>S. thermophilus</i> STUL5003 cassette with #25 (433 pb) [58°C] |
| 25 | TTTGCTTGGTAAAGCATTATGG       | Used with #24                                                                       |
| 26 | GGAGAGAATATTGAATGGACTAATG    | Sequencing of the <i>S. thermophilus</i> STUL5003 cassette with #27 (455 pb) [58°C] |
| 27 | TCTAAAGCTGACGGGGTAAA         | Used with #26                                                                       |
| 28 | TATAGTTTACCCCGTCAGCTTTAG     | Sequencing of the <i>S. thermophilus</i> STUL5003 cassette with #29 (445 pb) [58°C] |
| 29 | GAAAGAGCCTGATGCACTCC         | Used with #22 and #28                                                               |
| 30 | CTCATGAGTGAGGCCGATG          | Sequencing of the <i>S. thermophilus</i> STUL5003 cassette with #31 (484 pb) [58°C] |
| 31 | CAGGCTTGATCCCCAGTAAG         | Used with #30                                                                       |
| 32 | TGGTATGACATTGCCTTCTG         | Sequencing of the <i>S. thermophilus</i> STUL5003 cassette with #33 (426 pb) [58°C] |
| 33 | TGCAAGTAAATTCACCTGTT         | Used with #32                                                                       |
| 34 | TTTCAAAAACAAGTGAAATCTTGA     | Sequencing of the STER_0004 locus with #35 (433 pb) [58°C]                          |
| 35 | AAGTGACGTCCGTAATAGCTG        | Used with #34                                                                       |
| 36 | GCTCGAGGACTTATCCAACG         | Sequencing of the STER_r0184/t0185 loci with #37 (298 pb) [58°C]                    |
| 37 | TACTCCGCCAGTAGGACTCG         | Used with #36                                                                       |
| 38 | CAAGTTTGTAGTTGGATTTTCTAGC    | Sequencing of the STER_0208 locus with #39 (613 pb) [58°C]                          |
| 39 | GCTGTTTTGAACTTGGGCTAA        | Used with #38                                                                       |
| 40 | CCACAGCTAGTGTGCTTGGT         | Sequencing of the STER_0303 locus with #41 (637 pb) [58°C]                          |
| 41 | TAGTTTCCGCCCTCAAGCGT         | Used with #40                                                                       |
| 42 | CGAAGGAAAAACCAAGGAGTT        | Sequencing of the STER_0303 locus with #43 (713 pb) [58°C]                          |
| 43 | TGGATACCTTCCCAACAGAA         | Used with #42                                                                       |
| 44 | GAAATCCATAAATTAAGAACCTTGTC   | Sequencing of the STER_0314 locus with #45 (974 pb) [58°C]                          |
| 45 | CGTGTCAGTCCTGCTGGTAA         | Used with #44                                                                       |
| 46 | AAAACCTTGTGGGGTTACTGG        | Sequencing of the STER_0399 locus with #47 (873 pb) [58°C]                          |
| 47 | AAGAACAGCGGCAACAAAAG         | Used with #46                                                                       |
| 48 | CACGTTTATTCCCAACAATCA        | Sequencing of the STER_0399 locus with #49 (712 pb) [58°C]                          |
| 49 | TGTCCGGAGAAACCAAGAAC         | Used with #48                                                                       |
| 50 | GCAAGAGTGATTGGCCTTGT         | Sequencing of the STER_0406 locus with #51 (1103 pb) [58°C]                         |
| 51 | CGCTGCTTCTTAATCTGGTG         | Used with #50                                                                       |
| 52 | CGTTTCTTTTGGCAAGGAAG         | Sequencing of the STER_0406 locus with #53 (622 pb) [58°C]                          |
| 53 | CGCCTTCCCAAGCTTTTTTA         | Used with #52                                                                       |
| 54 | CACGCGATACAGATATTAAGAAGG     | Sequencing of the STER_0498/0499 loci with #55 (802 pb) [58°C]                      |
| 55 | CGCTACCACAAAAAGCACCT         | Used with #54                                                                       |
| 56 | AGATGAACTGGATGGGCTTG         | Sequencing of the STER_0498/0499 loci with #57 (837 pb) [58°C]                      |
| 57 | GCAGGATTTTTCGCTGAGAC         | Used with #56                                                                       |
| 58 | TGTAGTCTTGCAAGGCTAAGGAA      | Sequencing of the STER_0498/0499 loci with #59 (818 pb) [58°C]                      |
| 59 | CACCAAGAGTTGCCAAAAA          | Used with #58                                                                       |
| 60 | TGCCCTAGCTTTGATGAAT          | Sequencing of the STER_0498/0499 loci with #61 (1011 pb) [58°C]                     |
| 61 | CCAGTGATACCAACGATTGAAA       | Used with #60                                                                       |
| 62 | TGTGACACCCCAATAAAAAATTA      | Sequencing of the STER_0572 locus with #63 (631 pb) [58°C]                          |
| 63 | GGTGAAATATAAACCACGGGAAG      | Used with #62                                                                       |
| 64 | TCTTTCACAGGATCAGGTTGC        | Sequencing of the STER_0572 locus with #65 (876 pb) [58°C]                          |
| 65 | TTGTGACTGAGTCGAAAATGAGA      | Used with #64                                                                       |
| 66 | CCCAGCTAATTCGGTTTGA          | Sequencing of the STER_0582/0583 loci with #67 (929 pb) [58°C]                      |
| 67 | AAATCGTACAAGATACTGATTATTCG   | Used with #66                                                                       |
| 68 | CTACTCCCAATTAGTAGAAAGTTTTCAG | Sequencing of the STER_0582/0583 loci with #69 (623 pb) [58°C]                      |
| 69 | CCCTCCTTGAATGGCAGATA         | Used with #68                                                                       |
| 70 | ATCCCATCAAAGGCTTCGTA         | Sequencing of the STER_0582/0583 loci with #71 (916 pb) [58°C]                      |
| 71 | TTTTGACTTCAAATATTACGTTACCT   | Used with #70                                                                       |
| 72 | GGCAAAGAGACCTGTTACGTG        | Sequencing of the STER_0711/0712 loci with #73 (1089 pb) [58°C]                     |
| 73 | TTCTTCTGAGATAAAGCCATCAA      | Used with #72                                                                       |
| 74 | CCCTCTTTTAGAAATGTTAGACCA     | Sequencing of the STER_0711/0712 loci with #75 (693 pb) [58°C]                      |
| 75 | GCTCTAAGATTGAGGTGAAGGTT      | Used with #74                                                                       |
| 76 | CGCAGCCCTCTTATCAATG          | Sequencing of the STER_0758 locus with #77 (738 pb) [58°C]                          |
| 77 | AACAAGAGAAAAAGCAAGAGC        | Used with #76                                                                       |
| 78 | GGTATTGCAAATCTTCAAAGTGA      | Sequencing of the STER_0807 locus with #79 (794 pb) [58°C]                          |
| 79 | TTTGATTCAAGTTGCTTTAAGTGG     | Used with #78                                                                       |
| 80 | AATCACTTTCTGGGAAGTCCA        | Sequencing of the STER_0811 locus with #81 (541 pb) [58°C]                          |
| 81 | CATTGGCATAATCCATAGTTTCAA     | Used with #80                                                                       |
| 82 | CCAACAGCTTTAACCAGATTGAC      | Sequencing of the STER_0901 locus with #83 (780 pb) [58°C]                          |
| 83 | CACCGATTCTGTAACGGAAG         | Used with #82                                                                       |
| 84 | AATGAATGAAGCCGCAAAAC         | Sequencing of the STER_0901 locus with #85 (941 pb) [58°C]                          |
| 85 | TTTTTGGGGTCAGTACAAAGG        | Used with #84                                                                       |
| 86 | GAAAAATGTCAAGATGCCATATCT     | Sequencing of the STER_0949 locus with #87 (699 pb) [58°C]                          |
| 87 | CCCATCTCCGATAACGACAA         | Used with #86                                                                       |
| 88 | AGGCTATCGGAATTGTCGAA         | Sequencing of the STER_0949 locus with #89 (958 pb) [58°C]                          |
| 89 | GCCCTTTCGACTGTAATCATT        | Used with #88                                                                       |
| 90 | ACACCGCTTCCAGAAAGTGT         | Sequencing of the STER_0972 locus with #91 (924 pb) [58°C]                          |
| 91 | GCCTACCAAGGCGTGT             | Used with #90                                                                       |
| 92 | CATGCTCGCAACTCATATTTAGTA     | Sequencing of the STER_1045/1046/1047/1048 loci with #93 (717 pb) [58°C]            |

|     |                             |                                                                          |
|-----|-----------------------------|--------------------------------------------------------------------------|
| 93  | ACAAAAGATCCGAGCGTGC         | Used with #92                                                            |
| 94  | TTTTCTCGTCAGTTGGTCTCC       | Sequencing of the STER_1045/1046/1047/1048 loci with #95 (842 pb) [58°C] |
| 95  | CATCCCCACTTCCAACCTCAC       | Used with #94                                                            |
| 96  | TGGAAGATGTAGGCAAGAAGC       | Sequencing of the STER_1045/1046/1047/1048 loci with #97 (828 pb) [58°C] |
| 97  | CAGTAACTAAAGCTAGGACAGTTCCA  | Used with #96                                                            |
| 98  | CTGTCTGGTGCCTTTTGTCC        | Sequencing of the STER_1045/1046/1047/1048 loci with #99 (777 pb) [58°C] |
| 99  | CCACCGCCTTCGAGTACTAA        | Used with #98                                                            |
| 100 | TCAATCAGTGAGTGCTTTTCG       | Sequencing of the STER_1073/1074 loci with #101 (1015 pb) [58°C]         |
| 101 | TGGGAATACGATAACTCCTCCT      | Used with #100                                                           |
| 102 | GGGCAACCGTATTTTATAGGG       | Sequencing of the STER_1073/1074 loci with #103 (1010 pb) [58°C]         |
| 103 | GCTCTACGCGCTAAGCAGGT        | Used with #102                                                           |
| 104 | GTCTGGCCGAAAAAGTGGTA        | Sequencing of the STER_1196/1197 loci with #105 (879 pb) [58°C]          |
| 105 | CAAGGTGATTAACCTTTTCCA       | Used with #104                                                           |
| 106 | TTGGACCCCTTCACTTATGC        | Sequencing of the STER_1196/1197 loci with #107 (732 pb) [58°C]          |
| 107 | TTGGATTGTCCAACCTTGCTTC      | Used with #106                                                           |
| 108 | TATGCGTGCATCTGGGACTA        | Sequencing of the STER_1196/1197 loci with #109 (1406 pb) [58°C]         |
| 109 | TGTTGTGAGTCTTACTCAAGGCTA    | Used with #108                                                           |
| 110 | GGACGACTTGGTTGGCATAG        | Sequencing of the STER_1319 locus with #111 (965 pb) [58°C]              |
| 111 | CAAGATTTCTCAATCCTGCTACTTT   | Used with #110                                                           |
| 112 | GAGGATGGAAATGTGAAAGCA       | Sequencing of the STER_1356/1357 loci with #113 (696 pb) [58°C]          |
| 113 | AGTTCAAGCGGAAAACTCAA        | Used with #112                                                           |
| 114 | GGTATTCAATATGATGACAATTCAGA  | Sequencing of the STER_1356/1357 loci with #115 (855 pb) [58°C]          |
| 115 | CCTCAGAATAATTAGCTACTGAAAATC | Used with #114                                                           |
| 116 | TTTTAGGAGGGGAACCGACT        | Sequencing of the STER_1356/1357 loci with #117 (1012 pb) [58°C]         |
| 117 | AGGAATATCAAAAACTGAGCCACAT   | Used with #116                                                           |
| 118 | TCCGATTTCATCAGCGATAG        | Sequencing of the STER_1371 locus with #119 (933 pb) [58°C]              |
| 119 | TCACGACGTTTGTAGTGTTC        | Used with #118                                                           |
| 120 | CGCTATTGGTATGGGAGCTG        | Sequencing of the STER_1371 locus with #121 (936 pb) [58°C]              |
| 121 | GATTGACAACGCTCGGTCTT        | Used with #120                                                           |
| 122 | GGACGTTAGCGAAGTGTCTT        | Sequencing of the STER_1453 locus with #123 (822 pb) [58°C]              |
| 123 | AGCCACTAGATCCCCAAGGT        | Used with #122                                                           |
| 124 | TTACGGCTGGATTGAAGGTT        | Sequencing of the STER_1453 locus with #125 (1044 pb) [58°C]             |
| 125 | CAGCAACAAGGAAAGCCATC        | Used with #124                                                           |
| 126 | TCTTGGATGAGGTGGGAAA         | Sequencing of the STER_1477 locus with #127 (873 pb) [58°C]              |
| 127 | TCTCCTCAATTAAGAAGTGACCT     | Used with #126                                                           |
| 128 | AAAAAGCAGATTTGCGTCTAGT      | Sequencing of the STER_1477 locus with #129 (1080 pb) [58°C]             |
| 129 | CCTTCTCTCTGGCAAATACAAA      | Used with #128                                                           |
| 130 | CCTTGGAAATTTGAGGACGTT       | Sequencing of the STER_1477 locus with #131 (1076 pb) [58°C]             |
| 131 | TCTCCGGTATACATATCTTTCCATT   | Used with #130                                                           |
| 132 | CGCACTTCAAAATGATCGAC        | Sequencing of the STER_1477 locus with #133 (1067 pb) [58°C]             |
| 133 | TTTTCTTAGCACCTTTTCAATTGTC   | Used with #132                                                           |
| 134 | GGGGGTATGCTGGAATTTCT        | Sequencing of the STER_1477 locus with #135 (889 pb) [58°C]              |
| 135 | CAATACAATGTCAGTTGTTTCCA     | Used with #134                                                           |
| 136 | TCTTATCCCTTGTATCGTGTTT      | Sequencing of the STER_1485 locus with #137 (569 pb) [58°C]              |
| 137 | AGCGGCAACTGTTTCTATCTT       | Used with #136                                                           |
| 138 | CTCGGGTGTACAATCGGTCT        | Sequencing of the STER_1494 locus with #139 (1087 pb) [58°C]             |
| 139 | AACCAGTTTGTCCGAAGCAC        | Used with #138                                                           |
| 140 | AAAAGCTTGAAGCATGGTCAC       | Sequencing of the STER_1693 locus with #141 (855 pb) [58°C]              |
| 141 | TGCAAGTAAATAAGTCGATTGAA     | Used with #140                                                           |
| 142 | TGCCTCGCTACTCGACTTTT        | Sequencing of the STER_1693 locus with #143 (648 pb) [58°C]              |
| 143 | ACCGTAGCTTATGCGTGTC         | Used with #143                                                           |
| 144 | AAATTCATTCGGTGGTGAG         | Sequencing of the STER_1726 locus with #145 (446 pb) [58°C]              |
| 145 | CTCAGATGAGGGCATTATTTTAATC   | Used with #144                                                           |
| 146 | GGTTTGTTAAGTAGTCAGTTTGATGC  | Sequencing of the STER_1743 locus with #147 (593 pb) [58°C]              |
| 147 | CAGCGAAGACGATATTGCAG        | Used with #146                                                           |
| 148 | CATGGTGGGAAATGACTTGA        | Sequencing of the STER_1814 locus with #149 (1111 pb) [58°C]             |
| 149 | GCTTGCCTTTTAAATCTTCCA       | Used with #148                                                           |
| 150 | GCTTTAGCACAAACGTGGAA        | Sequencing of the STER_1824 locus with #151 (941 pb) [58°C]              |
| 151 | ACCAATGATCCCACCAGAAA        | Used with #150                                                           |
| 152 | CCAGCTAAATGGCGTACCAA        | Sequencing of the STER_1859 locus with #153 (1031 pb) [58°C]             |
| 153 | CAACGATAGCTGCTTGTTTCA       | Used with #152                                                           |
| 154 | GCTGGGAATGTCCCATCTTA        | Sequencing of the STER_1859 locus with #155 (976 pb) [58°C]              |
| 155 | GCGATAATCACATCTGGTTGG       | Used with #154                                                           |
| 156 | CAACACTTGGCAGGACGTA         | Sequencing of the STER_1904/1905/1906 loci with #157 (945 pb) [58°C]     |
| 157 | TGCAGCTTCAACTGCTTGTT        | Used with #156                                                           |
| 158 | AGAAGGAAACAAATTCGCTGA       | Sequencing of the STER_1904/1905/1906 loci with #159 (604 pb) [58°C]     |
| 159 | TTGTTGTTACGACCAGCTTTG       | Used with #158                                                           |
| 160 | CGTGTTAGACGTTTACTGGTT       | Sequencing of the STER_1904/1905/1906 loci with #161 (850 pb) [58°C]     |
| 161 | CGTCCAACTGGTGCTTTACC        | Used with #160                                                           |
| 162 | GGTAACGCTCTTCCACTTGC        | Sequencing of the STER_1904/1905/1906 loci with #163 (557 pb) [58°C]     |
| 163 | CGTCCCATTTGTAGTTTCTCC       | Used with #162                                                           |
| 164 | TGGAAGATAAAGAGACAAAACAAAGA  | Sequencing of the STER_1951 locus with #165 (865 pb) [58°C]              |

|     |                           |                                                              |
|-----|---------------------------|--------------------------------------------------------------|
| 165 | CGCAAAGGATTTTCTTCCAA      | Used with #164                                               |
| 166 | CCAGAGGTCCAAAAACCTGT      | Sequencing of the STER_1951 locus with #167 (847 pb) [58°C]  |
| 167 | TGGCTTTGAAGGTATCTGCTG     | Used with #166                                               |
| 168 | CCAATATGGTACGTGGTCTGG     | Sequencing of the STER_1951 locus with #169 (682 pb) [58°C]  |
| 169 | GATCACTCGCAGGTTTCATCA     | Used with #168                                               |
| 170 | TTCGCTTTTGAAGTGTGACG      | Sequencing of the STER_1952 locus with #171 (583 pb) [58°C]  |
| 171 | TACCGTTGATACGGACGTTG      | Used with #170                                               |
| 172 | GGTGGCACCTTGATTTCTTA      | Sequencing of the STER_1952 locus with #173 (973 pb) [58°C]  |
| 173 | TCCACGAAACTTTTCTTGCT      | Used with #172                                               |
| 174 | TCTCTAAGTGTTCCTAGCTTCAA   | Sequencing of the STER_1968 locus with #175 (1040 pb) [58°C] |
| 175 | GGCTAATTTGAGCTGGCTTTT     | Used with #174                                               |
| 176 | TTGGACGAACATAAATAGTGACG   | Sequencing of the STER_B1 locus with #177 (603 pb) [58°C]    |
| 177 | AGACGTCTCTTTTCGTAATTTTAAT | Used with #176                                               |

The numbers in parentheses and square brackets correspond to expected amplicons sizes and PCR annealing temperatures, respectively. †: A touchdown PCR was applied for the first 20 cycles with a 1°C decrease per cycle from 60°C to 40°C followed by a constant 42°C annealing temperature for the last 30 cycles. \*: Sequences in bold and italics correspond to loxP sites.

**Table S2.** Inserts from activated R-IVET clones identified at T0 in the different gut models

| Inser<br>t | Locus<br>STER <sup>a</sup><br>(STER_RS0)<br>b | Gene description                                                       | Location and<br>direction<br>compared to the<br>gene <sup>c</sup> | Position of the<br>insert on LMD-<br>9 genome (nt) | TIM<br>mode<br>I | Caco-2 TC7    | Batch<br>cultures of<br>human<br>fecal<br>microbiot<br>a |
|------------|-----------------------------------------------|------------------------------------------------------------------------|-------------------------------------------------------------------|----------------------------------------------------|------------------|---------------|----------------------------------------------------------|
| 1          | B2 (9835)                                     | Plasmid rolling circle<br>replication initiator protein                | Promoter/sense                                                    | 2082-2433                                          |                  | LM17/DME<br>M |                                                          |
| 2          | 0060 (0310)                                   | Phosphoribosylaminoimidazol<br>e carboxylase ATPase subunit            | Inside/sense                                                      | 48325-49378                                        |                  |               |                                                          |
| 3          | 0071 (0360)                                   | Hypothetical protein                                                   | Promoter/sense                                                    | 58621-59672                                        |                  |               |                                                          |
| 4          | 0095 (0480)                                   | <i>polC</i> : DNA polymerase III<br>catalytic subunit, PolC            | Inside/sense                                                      | 75226-76208                                        |                  | DMEM          |                                                          |
| 5          | 0096 (0485)                                   | PepS aminopeptidase. Metallo<br>peptidase. MEROPS family<br>M29        | Promoter sense                                                    | 77288-77475                                        |                  | DMEM          |                                                          |
| 6          | 0113 (0565)                                   | D-alanyl-D-alanine<br>carboxypeptidase, penicillin-<br>binding protein | Promoter/sense                                                    | 93170-92322                                        |                  | LM17/DME<br>M |                                                          |
| 7          | 0120 (0595)                                   | Hypothetical protein                                                   | Promoter/sense                                                    | 98597-99644                                        |                  |               |                                                          |
| 8          | 0124 (0615)                                   | Hypothetical protein                                                   | Inside/sense                                                      | 102285-102381                                      |                  | DMEM          |                                                          |
| 9          | 0125 (0620)                                   | Hypothetical protein                                                   | Promoter/sense                                                    | 102382-102740                                      |                  | LM17          |                                                          |
| 10         | 0148 (0715)                                   | Transposase                                                            | Promoter/antisens<br>e                                            | 122595-122799                                      |                  |               |                                                          |
| 11         | 0206 (1015)                                   | Crp-like transcriptional<br>regulator                                  | Promoter/sense                                                    | 175028-174569                                      |                  | LM17/DME<br>M |                                                          |
| 12         | 0207 (1020)                                   | Permease of the major<br>facilitator superfamily                       | Promoter/sense                                                    | 174822-175620                                      |                  | LM17          |                                                          |
| 13         | 0207 (1020)                                   | Permease of the major<br>facilitator superfamily                       | Inside/sense                                                      | 175029-175686                                      |                  | DMEM          |                                                          |
| 14         | 0236 (1155)                                   | Auxin efflux carrier (AEC)<br>family permease                          | Promoter/sense                                                    | 200160-200652                                      |                  | LM17          |                                                          |
| 15         | 0245 (1200)                                   | CDP-diglyceride synthetase                                             | Inside/antisense                                                  | 208815-208140                                      |                  | LM17          |                                                          |
| 16         | 0384 (1865)                                   | <i>rbfA</i> : ribosome-binding factor<br>A                             | Promoter/sense                                                    | 336578-337533                                      |                  | LM17/DME<br>M |                                                          |
| 17         | 0468 (2300)                                   | N-formylmethionyl-tRNA<br>deformylase                                  | Promoter/sense                                                    | 414741-415335                                      |                  | LM17/DME<br>M |                                                          |
| 18         | 0509 (1030)                                   | Glycopeptide antibiotics<br>resistance protein                         | Promoter/sense                                                    | 457780-457906                                      |                  | LM17          |                                                          |
| 19         | 0531 (2605)                                   | Ammonia permease                                                       | Promoter/sense                                                    | 477410-477541                                      |                  | LM17          |                                                          |
| 20         | 0537 (2635)                                   | N-acetylglucosamine 6-<br>phosphate deacetylase                        | Promoter/sense                                                    | 481688-482351                                      |                  | LM17          |                                                          |
| 21         | 0573 (2825)                                   | Predicted protein                                                      | Promoter/sense                                                    | 517470-518024                                      |                  |               |                                                          |
| 22         | 0583 (2870)                                   | Response regulator of the<br>LytR/AlgR family                          | Promoter/sense                                                    | 531843-530990                                      |                  |               |                                                          |
| 23         | 0611 (3000)                                   | Glycosyl transferase, family 1                                         | Inside/sense                                                      | 555151-556148                                      |                  |               |                                                          |
| 24         | 0612 (3005)                                   | Hypothetical protein                                                   | Promoter/sense                                                    | 556224-556595                                      |                  | DMEM          |                                                          |

|    |                    |                                                                                                   |                    |                 |  |            |  |
|----|--------------------|---------------------------------------------------------------------------------------------------|--------------------|-----------------|--|------------|--|
| 25 | 0623 (3055)        | Dihydrofolate reductase                                                                           | Promoter/sense     | 566220-566539   |  |            |  |
| 26 | 0623 (3055)        | Dihydrofolate reductase                                                                           | Promoter/sense     | 566220-566311   |  | LM17       |  |
| 27 | 0660 (3255)        | Methenyltetrahydrofolate cyclohydrolase                                                           | Promoter/sense     | 598595-598901   |  | LM17       |  |
| 28 | 0711 (3500)        | CRISPR-associated protein, Cas2 family                                                            | Promoter/sense     | 647294-647916   |  |            |  |
| 29 | 0744 (3650)        | Uncharacterized conserved protein                                                                 | Promoter/sense     | 675683-675866   |  |            |  |
| 30 | 0747 (3665)        | Type I site-specific restriction-modification system, R (restriction) subunit or related helicase | Inside/sense       | 679498-680421   |  |            |  |
| 31 | 0761 (3735)        | <i>hola</i> : DNA polymerase III subunit delta                                                    | Promoter/sense     | 694068-694911   |  |            |  |
| 32 | 0813 (4000)        | Uncharacterized conserved phage related protein                                                   | Promoter/sense     | 747866-747426   |  |            |  |
| 33 | 0830 (4075)        | Hypothetical protein                                                                              | Promoter/sense     | 755652-756572   |  |            |  |
| 34 | 0872 (4310)        | Enzyme related to GTP cyclohydrolase I                                                            | Promoter/sense     | 802930-803563   |  | LM17       |  |
| 35 | 0885 (4380)        | Cystathionine beta-synthase (acetylserine-dependent)                                              | Promoter/sense     | 817241-817531   |  |            |  |
| 36 | 0948 (4690)        | Ferrochelatase                                                                                    | Promoter/sense     | 877316-878238   |  | LM17/DME M |  |
| 37 | 0949 (4595)        | Threonine dehydrogenase or related Zn-dependent dehydrogenase                                     | Promoter/sense     | 879316-879396   |  | LM17       |  |
| 38 | 0950/0951 (-/4700) | Hypothetical protein/pseudogene                                                                   | Promoter/sense     | 879949-880988   |  | LM17       |  |
| 39 | 0981 (4840)        | <i>pyrE</i> : Orotate phosphoribosyltransferase                                                   | Promoter/sense     | 905098-905735   |  | DMEM       |  |
| 40 | 1012 (4990)        | Lysyl aminopeptidase. Metallo peptidase. MEROPS family M01                                        | Inside/sense       | 934009-935056   |  |            |  |
| 41 | 1013 (4995)        | <i>xerS</i> : Site-specific tyrosine recombinase XerS                                             | Promoter/sense     | 936928-935885   |  | LM17/DME M |  |
| 42 | 1043 (5175)        | Pseudogene                                                                                        | Promoter/sense     | 967939-968905   |  | LM17       |  |
| 43 | 1102 (5460)        | <i>prfB</i> : peptide chain release factor 2                                                      | Promoter/sense     | 1019356-1018918 |  |            |  |
| 44 | 1166 (5755)        | Putative translation factor (SUA5)                                                                | Promoter/sense     | 1078437-1078262 |  | LM17/DME M |  |
| 45 | 1197 (5905)        | Cell division membrane protein                                                                    | Promoter/sense     | 1106940-1106003 |  |            |  |
| 46 | 1238 (6110)        | Uridine kinase                                                                                    | Promoter/sense     | 1144304-1143294 |  | LM17       |  |
| 47 | 1280 (6320)        | <i>urvC</i> : excinuclease ABC subunit C                                                          | Inside/sense       | 1190055-1189837 |  | LM17/DME M |  |
| 48 | 1293 (6375)        | ABC-type multidrug transport system, ATPase component                                             | Promoter/antisense | 1201333-1202291 |  |            |  |
| 49 | 1298 (-)           | Hypothetical protein                                                                              | Promoter/sense     | 1206867-1207715 |  |            |  |
| 50 | 1320 (6520)        | Predicted ring-cleavage extradiol dioxygenase                                                     | Inside/antisense   | 1228239-1228286 |  | DMEM       |  |
| 51 | 1356 (6690)        | Radical SAM superfamily enzyme                                                                    | Inside/sense       | 1260895-1260614 |  | LM17/DME M |  |
| 52 | 1400 (6885)        | Predicted hydrolase of the HAD superfamily                                                        | Promoter/sense     | 1310880-1309989 |  |            |  |
| 53 | 1406 (6915)        | ABC-type dipeptide/oligopeptide/nickel transport system, ATPase component                         | Inside/sense       | 1314940-1314560 |  | LM17/DME M |  |
| 54 | 1408 (6925)        | ABC-type dipeptide/oligopeptide/nickel transport system, permease component                       | Inside/sense       | 1317075/1316209 |  |            |  |
| 55 | 1453 (7150)        | Aminotransferase                                                                                  | Promoter/sense     | 1361583-1361200 |  | DMEM       |  |

|    |                       |                                                                                        |                  |                 |               |  |
|----|-----------------------|----------------------------------------------------------------------------------------|------------------|-----------------|---------------|--|
| 56 | 1469 (7225)           | Uncharacterized protein, possibly involved in aromatic compounds catabolism            | Promoter/sense   | 1374989-1374939 | LM17/DME<br>M |  |
| 57 | 1518 (7470)           | SSU ribosomal protein S5P alanine acetyltransferase                                    | Promoter/sense   | 1422905-1422091 | LM17          |  |
| 58 | 1522 (7490)           | 1-acyl-sn-glycerol-3-phosphate acyltransferase                                         | Promoter/sense   | 1428562-1427572 |               |  |
| 59 | 1539 (7565)           | ABC-type amino acid transport/signal transduction system, periplasmic component/domain | Promoter/sense   | 1443950-1443474 | DMEM          |  |
| 60 | 1579 (7760)           | Hypothetical protein                                                                   | Inside/antisense | 1479868-1480392 | LM17/DME<br>M |  |
| 61 | 1585 (7790)           | Predicted GTPase                                                                       | Inside/antisense | 1484613-1485240 |               |  |
| 62 | 1586 (7795)           | Predicted hydrolase of the HAD superfamily                                             | Promoter/sense   | 1486730-1486347 | LM17          |  |
| 63 | 1591 (7815)           | <i>gatA</i> : aspartyl/glutamyl-tRNA(Asn/Gln) amidotransferase subunit A               | Inside/sense     | 1490454-1490313 | DMEM          |  |
| 64 | 1597 (7840)           | ABC-type metal ion transport system, periplasmic component/surface antigen             | Promoter/sense   | 1495479-1495063 |               |  |
| 65 | 1643 (8060)           | Hypothetical protein                                                                   | Promoter/sense   | 1535445-1535290 | LM17          |  |
| 66 | 1664 (8140)           | Superfamily II DNA and RNA helicase                                                    | Promoter/sense   | 1554241-1553929 | LM17          |  |
| 67 | 1684 (8235)           | Response regulator of the LytR/AlgR family                                             | Promoter/sense   | 1576456-1576201 | LM17/DME<br>M |  |
| 68 | 1736 (8480)           | DNA polymerase I                                                                       | Promoter/sense   | 1625236-1624238 | LM17          |  |
| 69 | 1774 (8680)           | Mg-dependent DNase                                                                     | Promoter/sense   | 1659581-1659384 | LM17/DME<br>M |  |
| 70 | 1846 (9020)           | Membrane carboxypeptidase (penicillin-binding protein)                                 | Promoter/sense   | 1723432-1723281 | DMEM          |  |
| 71 | 1862 (9110)           | Pseudogene                                                                             | Promoter/sense   | 1743723-1742676 | LM17          |  |
| 72 | 1866 (9140)           | Hypothetical protein                                                                   | Promoter/sense   | 1745938-1745578 |               |  |
| 73 | 1895 (9285)           | LSU ribosomal protein L5P                                                              | Promoter/sense   | 1763621-1763389 |               |  |
| 74 | 1912/1911 (9365/9370) | Protein-tyrosine-phosphatase/Uncharacterized protein conserved in bacteria             | Promoter/sense   | 1773889-1772913 |               |  |
| 75 | P1: 0061 (0315)       | Pseudogene                                                                             | Inside/antisense | 50147-50034     | LM17/DME<br>M |  |
|    | P2: -                 | No gene identified                                                                     | -                | 428255-428540   |               |  |
| 76 | P1: 0107 (0535)       | Predicted membrane protein                                                             | Inside/antisense | 85074-85135     | LM17/DME<br>M |  |
|    | P2: 1980 (9680)       | Hypothetical protein                                                                   | Promoter/sense   | 1834023-1833850 |               |  |
|    | P3: 0338 (-)          | Hypothetical protein                                                                   | Promoter/sense   | 292729-292793   |               |  |
| 77 | P1: 0157 (0760)       | Uncharacterized conserved protein                                                      | Inside/sense     | 129818-129958   | LM17          |  |
|    | P2: 0633 (3105)       | DNA topoisomerase IV subunit B                                                         | Inside/sense     | 575858-576757   |               |  |
| 78 | P1: 0220 (1070)       | Cysteine desulfurase                                                                   | Inside/sense     | 186671-187317   | LM17/DME<br>M |  |
|    | P2: 1772 (8670)       | <i>ksgA</i> : dimethyladenosine transferase                                            | Promoter/sense   | 1658295-1657961 |               |  |
| 79 | P1: 0267 (1295)       | Pseudogene                                                                             | Inside/antisense | 227033-227182   | LM17/DME<br>M |  |
|    | P2: B2 (9835)         | Plasmid rolling circle replication initiator protein                                   | Inside/antisense | 2435-2300       |               |  |
| 80 | P1: 0307 (1490)       | <i>scpA</i> : segregation and condensation protein A                                   | Inside/sense     | 264475-264593   | DMEM          |  |

|    |                 |                                                                                        |                    |                 |            |  |
|----|-----------------|----------------------------------------------------------------------------------------|--------------------|-----------------|------------|--|
| 81 | P2: 1111 (5495) | Predicted hydrolase of the HAD superfamily                                             | Promoter/sense     | 1025666-1026525 | LM17       |  |
|    | P1: 0311 (1510) | Trk-type K <sup>+</sup> transport system, membrane component                           | Promoter/antisense | 268092-268381   |            |  |
|    | P2: 0198 (0970) | 5'-nucleotidase/2',3'-cyclic phosphodiesterase or related esterase                     | Inside/antisense   | 164148-164035   |            |  |
| 82 | P3: 0662 (3265) | Cell division protein FtsI/penicillin-binding protein 2                                | Promoter/sense     | 600539-601100   | LM17       |  |
|    | P1: 0351 (1710) | Trk-type K <sup>+</sup> transport system, membrane component                           | Inside/antisense   | 307122-307554   |            |  |
|    | P2: 0839 (4130) | Pseudogene                                                                             | Inside/antisense   | 768120-767545   |            |  |
| 83 | P1: 0388 (1890) | Membrane protein involved in polysaccharide transport                                  | Inside/sense       | 342566-342669   | LM17/DME M |  |
|    | P2: 0744 (3650) | Uncharacterized conserved protein                                                      | Promoter/sense     | 675681-675865   |            |  |
| 84 | P1: 0528 (2590) | Regulator of signaling phosphorelay                                                    | Promoter/antisense | 475645-474908   | LM17       |  |
|    | P2: -           | No gene identified                                                                     | -                  | 832730-832547   |            |  |
| 85 | P1: 0694 (3415) | Malate dehydrogenase (NAD)                                                             | Inside/antisense   | 630957-630878   | DMEM       |  |
|    | P2: 1123 (5555) | UDP-N-acetylglucosamine 1-carboxyvinyltransferase                                      | Promoter/sense     | 1037911-1036955 |            |  |
| 86 | P1: 0751 (3685) | Hypothetical protein                                                                   | Inside/antisense   | 684811-184699   | LM17/DME M |  |
|    | P2: 1513 (7445) | NAD-dependent DNA ligase                                                               | Inside/sense       | 1418027-1417943 |            |  |
|    | P3: 1524 (7500) | Hypothetical protein                                                                   | Promoter/sense     | 1428673-1428787 |            |  |
| 87 | P1: 0761 (3735) | <i>hola</i> : DNA polymerase III, delta subunit                                        | Promoter/sense     | 694511-694643   | LM17       |  |
|    | P2: 0699 (3440) | Tellurite resistance protein or related permease                                       | Inside/antisense   | 636263-636379   |            |  |
| 88 | P1: 0777 (3810) | Cell division protein FtsZ                                                             | Inside/antisense   | 710969-710860   | DMEM       |  |
|    | P2: 1454 (7155) | ABC-type amino acid transport/signal transduction system, periplasmic component/domain | Promoter/antisense | 1362197-1363049 |            |  |
| 89 | P1: 1103 (-)    | Hypothetical protein                                                                   | Promoter/sense     | 1019044-1018908 | LM17       |  |
|    | P2: 0375 (1820) | Xanthine/uracil/vitamin C permease                                                     | Inside/sense       | 329323-329405   |            |  |
|    | P3: 1861 (9105) | Pseudogene                                                                             | Inside/sense       | 1742078-1741907 |            |  |
| 90 | P1: 1134 (5600) | Hypothetical protein                                                                   | Inside/antisense   | 1047111-1047304 |            |  |
|    | P2: 0289 (1400) | <i>greA</i> : transcription elongation factor GreA                                     | Promoter/sense     | 251808-252550   |            |  |
| 91 | P1: 1139 (5625) | GAF domain-containing protein                                                          | Promoter/sense     | 1054731-1054392 | LM17/DME M |  |
|    | P2: 1715 (8380) | Translation elongation factor P (EF-P)                                                 | Inside/sense       | 1606151-1606065 |            |  |
| 92 | P1: 1379 (6790) | Glutamate-cysteine ligase                                                              | Inside/antisense   | 1287692-1287449 | LM17/DME M |  |
|    | P2: 0336 (1635) | NUDIX family hydrolase                                                                 | Promoter/antisense | 289592-288847   |            |  |
| 93 | P1: 1400 (6885) | Predicted hydrolase of the HAD superfamily                                             | Inside/sense       | 1310087/1309642 | LM17/DME M |  |
|    | P2: 0574 (2830) | Uncharacterized conserved phage related protein                                        | Inside/sense       | 518690-519174   |            |  |
| 94 | P1: 1413 (6950) | Transposase                                                                            | Inside/antisense   | 1324280-1324120 |            |  |
|    | P2: 0252 (1225) | <i>groES</i> : co-chaperonin GroES (HSP10)                                             | Promoter/sense     | 215497-215643   |            |  |

|     |                 |                                                                           |                    |                  |            |  |
|-----|-----------------|---------------------------------------------------------------------------|--------------------|------------------|------------|--|
| 95  | P3: 0252 (1225) | <i>groES</i> : co-chaperonin GroES (HSP10)                                | Promoter/sense     | 215675-215798    |            |  |
|     | P1: 1461 (7190) | ABC-type amino acid transport system, periplasmic and permease components | Inside/antisense   | 1369441-1369027  |            |  |
|     | P2: 1710 (8355) | Sucrose PTS, EIIBCA                                                       | Inside/sense       | 1600881-1600629  |            |  |
| 96  | P3: 1489 (7320) | Phosphoserine aminotransferase                                            | Promoter/sense     | 1395106-1394818  |            |  |
|     | P1: 1534 (7550) | UDP-N-acetylmuramoyl-tripeptide--D-alanyl-D-alanine ligase                | Promoter/sense     | 1441347-1440845  |            |  |
|     | P2: 0862 (4250) | Uncharacterized protein conserved in bacteria                             | Inside/sense       | 796404-796597    |            |  |
| 97  | P3: 0864 (4260) | <i>asnC</i> : asparaginyl-tRNA synthetase                                 | Inside/sense       | 798722-799012    |            |  |
|     | P1: 1676 (8195) | Glutamate 5-kinase                                                        | Promoter/sense     | 1564089-1563756  | LM17/DME M |  |
|     | P2: 1797 (8780) | <i>rplA</i> : LSU ribosomal protein L1P                                   | Inside/antisense   | 1681062-16811278 |            |  |
| 98  | P1: 1682 (8225) | DNA helicase/exodeoxyribonuclease V, subunit B                            | Promoter/sense     | 1574798-1574554  | LM17/DME M |  |
|     | P2: 0389 (1895) | Pseudogene                                                                | Promoter/antisense | 343134-343016    |            |  |
|     | P1: 1684 (8235) | Response regulator of the LytR/AlgR family                                | Promoter/sense     | 1576456-1576301  |            |  |
| 100 | P2: 0383 (1860) | <i>infB</i> : bacterial translation initiation factor 2 (bIF-2)           | Inside/antisense   | 336251-335993    |            |  |
|     | P1: 1689 (8255) | Uncharacterized protein conserved in bacteria (Cof family protein)        | Inside/sense       | 1578827-1578740  | LM17/DME M |  |
|     | P2: 1000 (4930) | <i>truB</i> : tRNA pseudouridine synthase B                               | Promoter/sense     | 922786-922977    |            |  |
| 101 | P1: 1690 (8260) | Asparaginase                                                              | Inside/antisense   | 1581011-1580885  | LM17       |  |
|     | P2: 0165 (0800) | <i>truA</i> : Pseudouridine synthase A                                    | Inside/antisense   | 139087-138850    |            |  |
|     | P3: -           | No gene identified                                                        | -                  | 1270201-1270550  |            |  |
| 102 | P1: 1709 (8350) | Fructokinase                                                              | Inside/sense       | 1599180-1599064  | DMEM       |  |
|     | P2: 1184 (5845) | <i>xseA</i> : exodeoxyribonuclease VII large subunit                      | Promoter/sense     | 1094776-1093928  |            |  |
|     | P1: 1746 (8530) | Acetyltransferase                                                         | Inside/antisense   | 1635078-1635212  |            |  |
| 104 | P2: 1180 (5825) | Transcriptional regulator, ArgR family                                    | Promoter/sense     | 1091139-1090473  |            |  |
|     | P1: 1827 (8925) | Glutamyl aminopeptidase. Metallo peptidase. MEROPS family M42             | Promoter/sense     | 1702403-1702595  | DMEM       |  |
|     | P2: 0760 (3730) | Phosphoenolpyruvate carboxylase                                           | Inside/antisense   | 692925-692835    |            |  |
| 105 | P1: 1857 (9070) | L-threonine synthase                                                      | Inside/sense       | 1736178-1735869  |            |  |
|     | P2: 0761 (3735) | <i>holA</i> : DNA polymerase III, delta subunit                           | Promoter/sense     | 694250-694640    |            |  |
|     | P1: 1889 (8255) | <i>rpmD</i> : 50S ribosomal protein L30                                   | Inside/antisense   | 1760360-1760519  | LM17/DME M |  |
| 107 | P2: 1555 (7645) | Chorismate mutase                                                         | Promoter/sense     | 1458978-1458361  |            |  |
|     | P1: 1946 (9515) | Hypothetical protein                                                      | Promoter/sense     | 1804618-1804321  | LM17/DME M |  |
|     | P2: 0126 (0625) | Ketopantoate reductase                                                    | Inside/antisense   | 103934-103277    |            |  |
| 108 | P1: 1969 (9630) | Predicted membrane protein                                                | Inside/antisense   | 1820741-1820903  |            |  |



|     |                    |                                              |                        |                     |      |  |
|-----|--------------------|----------------------------------------------|------------------------|---------------------|------|--|
| 109 | P2: 1992<br>(9740) | Inosine-5'-monophosphate<br>dehydrogenase    | Promoter/antisens<br>e | 1845233-<br>1846062 | DMEM |  |
|     | P1: 1969<br>(9630) | Predicted membrane protein                   | Inside/antisense       | 1820633-<br>1820859 |      |  |
|     | P2: 0595<br>(2930) | Pseudogene                                   | Promoter/antisens<br>e | 541106-540512       |      |  |
| 110 | P1: -              | No gene identified                           | -                      | 429681-429550       | DMEM |  |
|     | P2: 0787<br>(3860) | <i>rpmE2</i> : LSU ribosomal<br>protein L31P | Promoter/sense         | 720571-720098       |      |  |

(<sup>a</sup>): locus annotation dating from 01-28-2014; (<sup>b</sup>): locus annotation dating from 07-30-2015 on NCBI; (<sup>c</sup>): See Fig. 5 for term explanations. P1, P2 and P3: when a single insert has overall or part of its sequence which aligns with different (two or three) regions of LMD-9 genome.

**Table S3.** Allele variability of R-IVET activated genes identified in TIM-1 and fecal batch cultures

|                                                       |                                                                         | Gene               |            |            |            |                    |                    |                    |           |           |           |            | Protein            |            |            |            |                    |                    |                    |           |           |           |            |                                   |                                  |
|-------------------------------------------------------|-------------------------------------------------------------------------|--------------------|------------|------------|------------|--------------------|--------------------|--------------------|-----------|-----------|-----------|------------|--------------------|------------|------------|------------|--------------------|--------------------|--------------------|-----------|-----------|-----------|------------|-----------------------------------|----------------------------------|
|                                                       | <i>S. thermophilus</i> classes <sup>c</sup>                             | 6                  | 6          | 6          | 5          | 4                  | 4                  | 3                  | 2         | 2         | 2         | 1          | 6                  | 6          | 6          | 5          | 4                  | 4                  | 3                  | 2         | 2         | 2         | 1          |                                   |                                  |
|                                                       | Resistance level to GI stresses <sup>d</sup>                            | High level         | High level | High level | High level | Intermediate level | Intermediate level | Intermediate level | Low level | Low level | Low level | High level | High level         | High level | High level | High level | Intermediate level | Intermediate level | Intermediate level | Low level | Low level | Low level | High level | Signature High Level <sup>e</sup> | Signature Low Level <sup>f</sup> |
| Locus<br>STER_ <sup>a</sup><br>(STER RS) <sup>b</sup> | Gene description                                                        | LMD-9 <sup>g</sup> | PB180      | PB302      | EBLST20    | LMG18311           | CNRZ160            | PB385              | EBL308    | ST14      | CNRZ21    | EBL385     | LMD-9 <sup>g</sup> | PB180      | PB302      | EBLST20    | LMG18311           | CNRZ160            | PB385              | EBL308    | ST14      | CNRZ21    | EBL385     |                                   |                                  |
| 0208 (01025)                                          | 30S ribosomal protein S15                                               | 1                  | 1          | 1          | 1          | 2                  | 2                  | 1                  | 3         | 4         | 4         | 1          | a                  | a          | a          | a          | a                  | a                  | a                  | a         | a         | a         | a          | a                                 | a                                |
| 0303 (01470)                                          | Non-canonical purine NTP pyrophosphatase                                | 1                  | 2          | 2          | 2          | 3                  | 4                  | 2                  | 5         | 6         | 1         | 2          | a                  | b          | b          | b          | c                  | c                  | b                  | d         | e         | a         | b          | b                                 | a/d/e/                           |
| 0399 (01945)                                          | Branched-chain amino acid ABC-type transport system, permease component | 1                  | 2          | 2          | 2          | 3                  | 4                  | 2                  | 5         | 6         | 3         | 7          | a                  | a          | a          | a          | a                  | a                  | a                  | a         | a         | a         | b          | a                                 | a                                |
| 0498 (02445)                                          | Predicted amydohydrolase                                                | 1                  | 2          | 2          | 2          | 3                  | N<br>D             | 2                  | N<br>D    | 4         | 3         | 5          | a                  | b          | b          | b          | c                  | ND                 | b                  | ND        | d         | c         | b          | b                                 | c/d                              |
| 0499 (02450)                                          | Transaminase                                                            | 1                  | 1          | 1          | 1          | 2                  | 3                  | 1                  | 4         | 5         | 2         | 6          | a                  | a          | a          | a          | b                  | a                  | a                  | c         | d         | b         | e          | a                                 | b/c/d                            |
| 0572 (02820)                                          | ABC permease transporter                                                | 1                  | 1          | 1          | 1          | -                  | -                  | 1                  | -         | -         | -         | 2          | a                  | a          | a          | a          | -                  | -                  | a                  | -         | -         | -         | b          | a                                 | -                                |
| 0901 (04465)                                          | LysR family transcriptional regulator                                   | 1                  | 1          | 1          | 1          | 2                  | 3                  | 1                  | 4         | 3         | 2         | 5          | a                  | a          | a          | a          | b                  | a                  | a                  | b         | a         | b         | c          | a                                 | b                                |
| 0949 (04695)                                          | Zn-dependant alcohol dehydrogenase                                      | 1                  | 1          | 1          | 1          | 2                  | 3                  | 1                  | 4         | 3         | 2         | 3          | a                  | a          | a          | a          | b                  | a                  | a                  | c         | a         | b         | a          | a                                 | a/b/c                            |
| 0972 (04800)                                          | CRISPR-associated endoribonuclease Cas6                                 | 1                  | 1          | 1          | 1          | 2                  | -                  | 1                  | 3         | 4         | 2         | 5          | a                  | a          | a          | a          | b                  | -                  | a                  | c         | c         | b         | d          | a                                 | c                                |
| 1046 (5190)                                           | Hypothetical protein                                                    | 1                  | 1          | 1          | 1          | 2                  | 3                  | 1                  | 4         | 5         | 2         | 4          | a                  | a          | a          | a          | b*                 | c**                | a                  | d**       | b*        | b*        | d**        | a                                 | b*                               |
| 1047 (05195)                                          | Predicted unusual protein kinase                                        | 1                  | 2          | 2          | 2          | 3                  | 4                  | 2                  | 5         | 6         | 3         | ND         | a                  | b          | b          | b          | c                  | d                  | b                  | e         | f         | c         | ND         | b                                 | c/e/f                            |
| 1048 (05200)                                          | Hypothetical protein (phasin protein superfamily)                       | 1                  | 1          | 1          | 1          | 2                  | 3                  | 1                  | 4         | 5         | 2         | ND         | a                  | a          | a          | a          | b                  | b                  | a                  | c         | d         | b         | ND         | a                                 | b/c/d                            |
| 1319 (06515)                                          | Hypothetical protein (nitroreductase-like protein family)               | 1                  | 2          | 2          | 2          | 3                  | 4                  | 5                  | 6         | 7         | 8         | 9          | a                  | b          | b          | b          | c                  | d                  | b                  | e         | f         | g         | e          | b                                 | e/f/g                            |
| 1356 (06690)                                          | KxxxW cyclic peptide radical SAM maturase                               | 1                  | 1          | 1          | 1          | -                  | -                  | 1                  | -         | -         | -         | 1          | a                  | a          | a          | a          | -                  | -                  | a                  | -         | -         | -         | a          | a                                 | -                                |
| 1357 (10575)                                          | Hypothetical protein                                                    | 1                  | 1          | 1          | 1          | -                  | -                  | 1                  | -         | -         | -         | 1          | a                  | a          | a          | a          | -                  | -                  | a                  | -         | -         | -         | a          | a                                 | -                                |
| 1693 (08275)                                          | Transcriptional regulator (helix-turn-helix XRE-family like protein)    | 1                  | 1          | 1          | 1          | -                  | -                  | 1                  | -         | -         | -         | -          | a                  | a          | a          | a          | -                  | -                  | a                  | -         | -         | -         | -          | a                                 | -                                |

|                                  |                                                                  |   |   |   |   |   |   |   |   |   |   |   |   |   |   |   |   |   |   |   |   |   |   |   |   |   |   |   |   |
|----------------------------------|------------------------------------------------------------------|---|---|---|---|---|---|---|---|---|---|---|---|---|---|---|---|---|---|---|---|---|---|---|---|---|---|---|---|
| <b>1814 (08865)</b>              | 2,3,4,5-tetrahydropyridine-2,6-dicarboxylate N-acetyltransferase | 1 | 1 | 1 | 1 | 2 | 1 | 1 | 3 | 1 | 2 | 4 | a | a | a | a | a | a | a | a | a | a | a | a | a | a | a | a | a |
| <b>1824 (08910)</b>              | EMAP domain-containing protein                                   | 1 | 1 | 1 | 1 | 2 | 3 | 1 | 4 | 5 | 6 | 7 | a | a | a | a | a | a | a | a | b | a | a | a | a | a | a | a | a |
| <b>1726 (08440)</b>              | 30S ribosomal protein S18                                        | 1 | 1 | 1 | 1 | 1 | 1 | 1 | 1 | 1 | 1 | 1 | a | a | a | a | a | a | a | a | a | a | a | a | a | a | a | a | a |
| <b>1905 (09335)</b>              | LSU ribosomal protein L23P                                       | 1 | 1 | 1 | 1 | 1 | 1 | 1 | 1 | 2 | 1 | 1 | a | a | a | a | a | a | a | a | a | a | a | a | a | a | a | a | a |
| <b>1906 (09340)</b>              | 50S ribosomal protein L4                                         | 1 | 1 | 1 | 1 | 2 | 2 | 1 | 1 | 3 | 2 | 1 | a | a | a | a | a | a | a | a | b | a | a | a | a | a | a | a | a |
| <b>1951 (09535)<sup>h</sup></b>  | Histidyl-tRNA synthetase                                         | 1 | 1 | 1 | 1 | 2 | 3 | 1 | 4 | 2 | 5 | 6 | a | a | a | a | b | c | a | d | b | b | a | a | a | a | a | a | a |
| <b>r0184 (00895)<sup>i</sup></b> | rRNA-5S ribosomal RNA                                            | 1 | 1 | 1 | 1 | 1 | 1 | 1 | 1 | 1 | 1 | 1 |   |   |   |   |   |   |   |   |   |   |   |   |   |   |   |   |   |
| <b>t0185 (00900)<sup>i</sup></b> | tRNA-Asn                                                         | 1 | 1 | 1 | 1 | 1 | 1 | 1 | 1 | 1 | 1 | 1 |   |   |   |   |   |   |   |   |   |   |   |   |   |   |   |   |   |

(<sup>a</sup>): locus annotation from 01-28-2014; (<sup>b</sup>): locus annotation from 07-30-2015 on NCBI; (<sup>c</sup>): according to Junjua *et al.*, 2016; (<sup>d</sup>): GIT stresses include acid pH, bile salts and oxidative stresses; (<sup>e</sup>): type of proteins found in strains exhibiting a high level of resistance against acid stress; (<sup>f</sup>): type of proteins found in strains exhibiting a low level of resistance against acid stress (<sup>g</sup>): LMD-9 used as a reference strain for comparison; (<sup>h</sup>): gene identified in a previous study (Uriot *et al.*, 2016); (<sup>i</sup>): no protein for these genes. (\*): stop codon after 20 amino acids; (\*\*): no stop codon identified. (-): no PCR amplicon; ND: PCR amplicons but with no analysable sequence.

**Table S4.** Allele variability of R-IVET activated genes identified in Caco-2 TC7 cells

|                        |                                                                      | Gene                                        |                             |                     |                     |                    |                     |                    |                             | Protein             |                             |                     |                     |                    |                     |                    |                             |
|------------------------|----------------------------------------------------------------------|---------------------------------------------|-----------------------------|---------------------|---------------------|--------------------|---------------------|--------------------|-----------------------------|---------------------|-----------------------------|---------------------|---------------------|--------------------|---------------------|--------------------|-----------------------------|
|                        |                                                                      | <i>S. thermophilus</i> classes <sup>c</sup> |                             |                     |                     |                    |                     |                    |                             |                     |                             |                     |                     |                    |                     |                    |                             |
|                        |                                                                      | 6                                           | 6                           | 5                   | 5                   | 4                  | 4                   | 2                  | 1                           | 6                   | 6                           | 5                   | 5                   | 4                  | 4                   | 2                  | 1                           |
|                        |                                                                      | High adhesion level                         | Intermediate adhesion level | High adhesion level | High adhesion level | Low adhesion level | High adhesion level | Low adhesion level | Intermediate adhesion level | High adhesion level | Intermediate adhesion level | High adhesion level | High adhesion level | Low adhesion level | High adhesion level | Low adhesion level | Intermediate adhesion level |
|                        | Adhesion capacity to HT29-MTX intestinal cells                       |                                             |                             |                     |                     |                    |                     |                    |                             |                     |                             |                     |                     |                    |                     |                    |                             |
| Locus                  | Gene description                                                     | LMD-9 <sup>d</sup>                          | PB18O                       | ST88                | EBLST20             | PB5MJ              | LMG18311            | CNRZ21             | EBL385                      | LMD-9 <sup>d</sup>  | PB18O                       | ST88                | EBLST20             | PB5MJ              | LMG18311            | CNRZ21             | EBL385                      |
| STER_ <sup>a</sup>     |                                                                      |                                             |                             |                     |                     |                    |                     |                    |                             |                     |                             |                     |                     |                    |                     |                    |                             |
| (STER_RS) <sup>b</sup> |                                                                      |                                             |                             |                     |                     |                    |                     |                    |                             |                     |                             |                     |                     |                    |                     |                    |                             |
| 0004 (00020)           | Hypothetical protein                                                 | 1                                           | 1                           | 1                   | 1                   | 1                  | 1                   | 2                  | -                           | a                   | a                           | a                   | a                   | a                  | a                   | b                  | -                           |
| 0314 (01525)           | Membrane protein                                                     | 1                                           | 1                           | 1                   | 1                   | 1                  | 2                   | 3                  | 4                           | a                   | a                           | a                   | a                   | a                  | b                   | b                  | b                           |
| 0406 (01985)           | Competence protein                                                   | 1                                           | 1                           | 1                   | 1                   | 1                  | 2                   | 2                  | 3                           | a                   | a                           | a                   | a                   | a                  | b                   | b                  | c                           |
| 0582 (02865)           | Predicted signal transduction protein with C-terminal HATPase domain | 1                                           | 1                           | 1                   | 1                   | 1                  | 2                   | 1                  | 1                           | a                   | a                           | a                   | a                   | a                  | b                   | a                  | a                           |
| 0583 (02870)           | DNA-binding response regulator                                       | 1                                           | 1                           | 1                   | 1                   | 1                  | 2                   | 2                  | 1                           | a                   | a                           | a                   | a                   | a                  | b                   | b                  | a                           |
| 0711 (03500)           | CRISPR-associated protein, Cas2 family                               | 1                                           | 2                           | 1                   | 2                   | 1                  | 3                   | 3                  | ND                          | a                   | b                           | a                   | b                   | a                  | c                   | c                  | ND                          |
| 0712 (03505)           | Uncharacterized conserved protein                                    | 1                                           | ND                          | 1                   | 2                   | 1                  | 3                   | 4                  | ND                          | a                   | ND                          | a                   | b                   | a                  | c                   | d                  | ND                          |
| 0758 (03720)           | Membrane protein                                                     | 1                                           | 1                           | 1                   | 1                   | 1                  | 2                   | 3                  | 4                           | a                   | a                           | a                   | a                   | a                  | b                   | c                  | d                           |
| 0807 (03965)           | Hypothetical protein                                                 | 1                                           | 2                           | 1                   | 2                   | 1                  | 3                   | 4                  | -                           | a                   | b*                          | a                   | b*                  | a                  | c**                 | d*                 | -                           |
| 0811 (03990)           | Transposase                                                          | 1                                           | 1                           | 1                   | 1                   | 1                  | -                   | -                  | 1                           | a                   | a                           | a                   | a                   | a                  | -                   | -                  | a                           |
| 1196 (05900)           | IS5 family transposase                                               | 1                                           | 1                           | 1                   | 1                   | 1                  | -                   | -                  | -                           | a                   | a                           | a                   | a                   | a                  | -                   | -                  | -                           |
| 1197 (05905)           | Rod shape-determining protein RodA                                   | 1                                           | 1                           | 1                   | 1                   | 1                  | 2                   | 3                  | 4                           | a                   | a                           | a                   | a                   | a                  | b                   | c                  | a                           |
| 1371 (06720)           | Galactokinase                                                        | 1                                           | ND                          | 1                   | 2                   | 1                  | 3                   | 4                  | 5                           | a                   | ND                          | a                   | b                   | a                  | b                   | b                  | c                           |
| 1453 (07150)           | Glutamine amidotransferase                                           | 1                                           | 1                           | 1                   | 1                   | 1                  | 2                   | 2                  | 3                           | a                   | a                           | a                   | a                   | a                  | b                   | b                  | c                           |
| 1477 (07260)           | Type II CRISPR RNA-guided endonuclease Cas9                          | 1                                           | 1                           | 1                   | 1                   | 1                  | -                   | -                  | 2                           | a                   | a                           | a                   | a                   | a                  | -                   | -                  | b                           |
| 1485 (07300)           | Arsenate reductase family protein                                    | 1                                           | 1                           | 1                   | 1                   | 1                  | 1                   | 2                  | 2                           | a                   | a                           | a                   | a                   | a                  | a                   | b                  | b                           |
| 1494 (07350)           | Spermidine/putrescine ABC transporter permease                       | 1                                           | 1                           | 1                   | 1                   | 1                  | 2                   | 3                  | 1                           | a                   | a                           | a                   | a                   | a                  | b                   | c                  | a                           |
| 1743 (08515)           | Branched-chain amino acid transporter                                | 1                                           | 1                           | 1                   | 1                   | 1                  | 2                   | 2                  | 3                           | a                   | a                           | a                   | a                   | a                  | b                   | b                  | b                           |
| 1968 (09625)           | Hypothetical protein                                                 | 1                                           | 1                           | 1                   | 1                   | 1                  | 2                   | 2                  | 1                           | a                   | a                           | a                   | a                   | a                  | b                   | b                  | a                           |
| B1 (09830)             | Acid-shock protein                                                   | 1                                           | -                           | 1                   | 1                   | 1                  | -                   | -                  | -                           | a                   | -                           | a                   | a                   | a                  | -                   | -                  | -                           |

(<sup>a</sup>): locus annotation dating from 01-28-2014; (<sup>b</sup>): locus annotation dating from 07-30-2015 on NCBI; (<sup>c</sup>): according to Junjua *et al.*, 2016; (<sup>d</sup>): LMD-9 used as a reference strain for comparison. (\*): an extra tryptophan at the end of sequence; (\*\*): stop codon after 60 amino acids. (-): no PCR amplicon; ND: No analysable sequence.
